# Supplementary material for: Transition metal phosphite complexes: from one-dimensional chain, two-dimensional sheet, to three-dimensional architecture with unusual magnetic properties
Source: Royal Society of Chemistry journal article supplement (doi:10.1039/c3ce41741g), 2013-11-11
Supplement: c3ce41741g.pdf [file c3ce41741g.pdf]

## Supporting Information

### **Transition-metal phosphite complexes: from one-dimensional chain, two-dimensional sheet, to three-dimensional architecture with unusual magnetic properties**

**Jumei Tian,<sup>a</sup> Bo Li,<sup>a,b</sup> Xiaoying Zhang,<sup>a</sup> and Jingping Zhang<sup>\*a</sup>**

<sup>a</sup> Faculty of Chemistry, Northeast Normal University, Changchun 130024, China. E-mail:

[jpzhang@nenu.edu.cn](mailto:jpzhang@nenu.edu.cn).

<sup>b</sup> Hebei Provincial Key Laboratory of Inorganic Nonmetallic Materials, College of Materials Science and Engineering, Hebei United University, Hebei, Tangshan 063009, China.

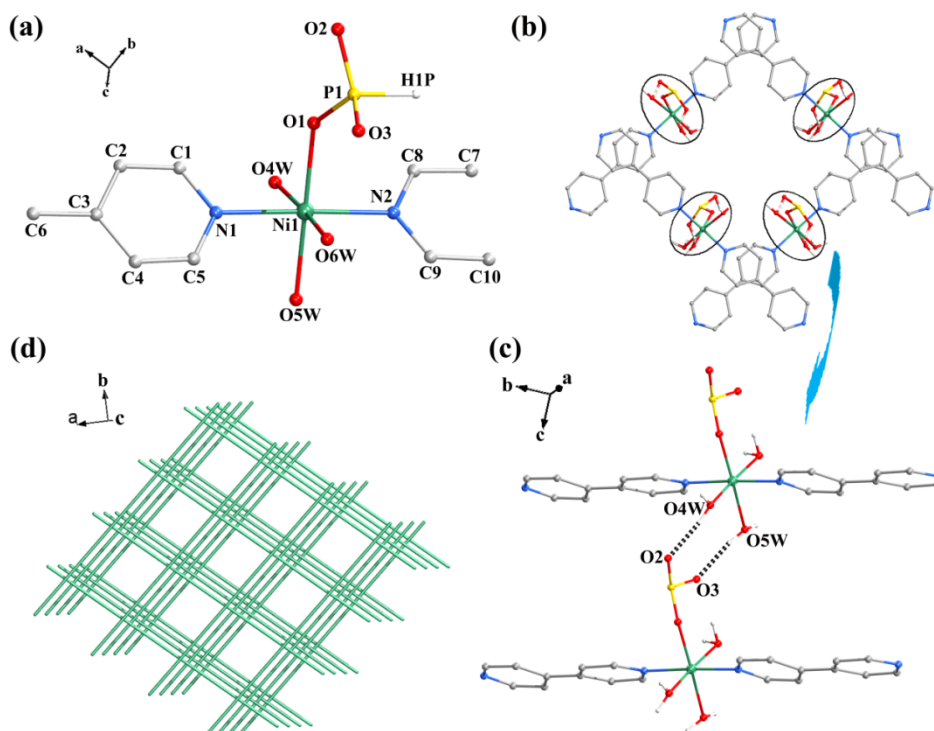

**Fig. S1** (a) View of the asymmetric unit and the numbering scheme of complex **1**. The hydrogen atoms are omitted for clarity. (b) View of the 3D supramolecular framework along *c* axis. (c) The hydrogen bonding interaction. (d) The topology of the supermolecular framework. The interstitial water molecules are not shown for clarity.

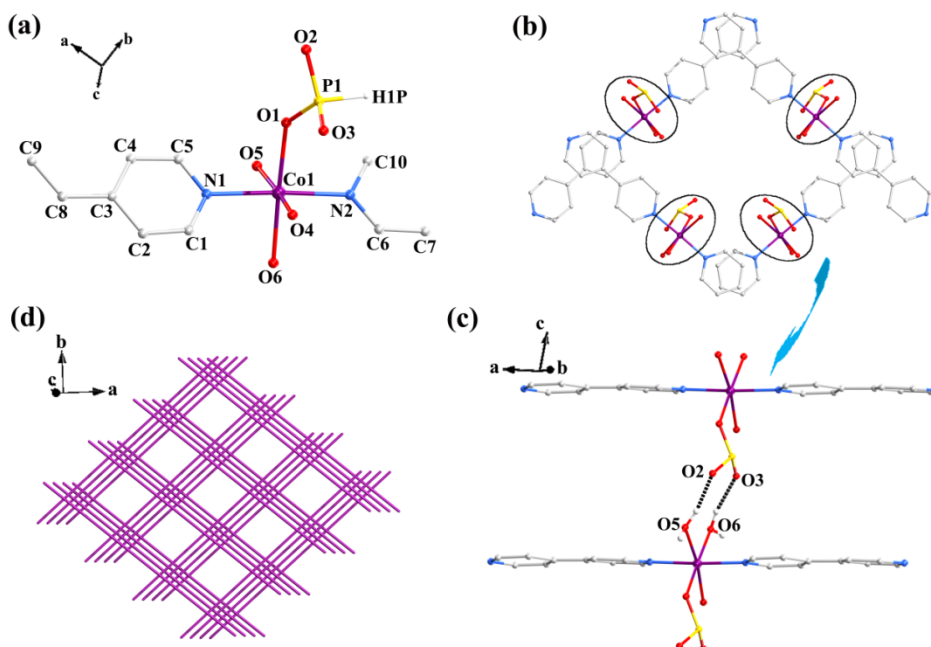

**Fig. S2** (a) View of the asymmetric unit and the numbering scheme of complex **2**. The hydrogen atoms are omitted for clarity. (b) View of the 3D supramolecular framework along *c* axis. (c) The hydrogen bonding interaction. (d) The topology of the supermolecular framework. The interstitial water molecules are not shown for clarity.

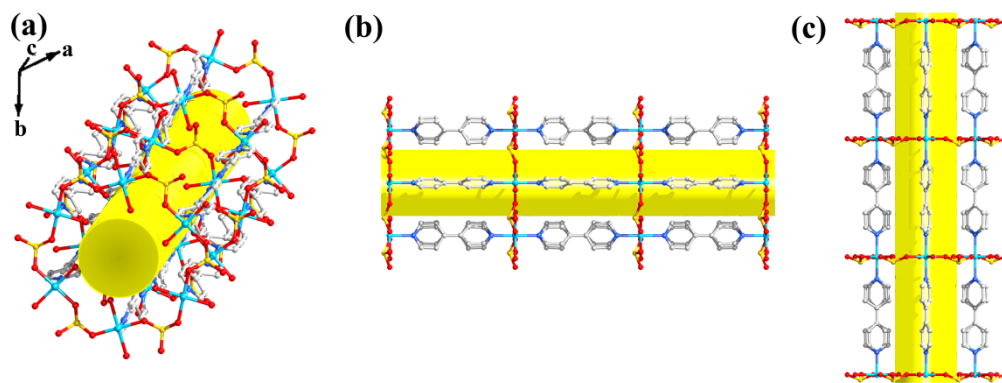

**Fig. S3** The 1D channel from different directions for Complex 4 (a) the given direction, (b) *a* axis, (c) *b* axis.

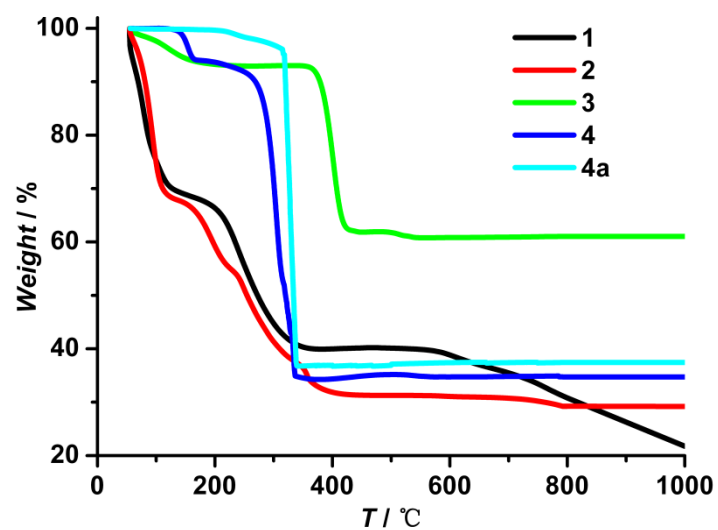

**Fig. S4.** The TGA curves for complexes 1-4 and 4a.

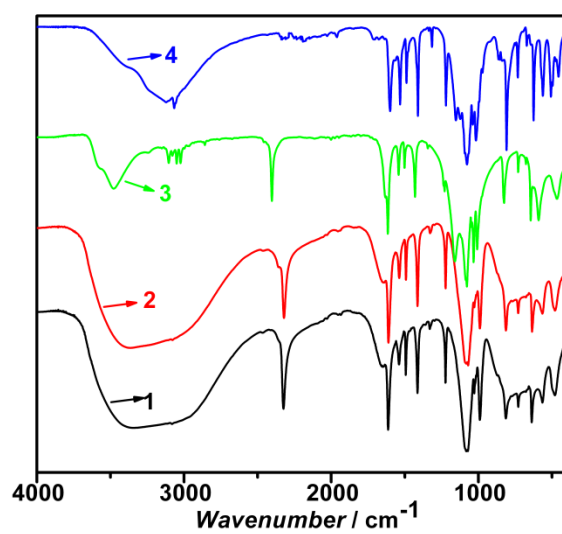

**Fig. S5** The IR spectra for complexes 1-4.

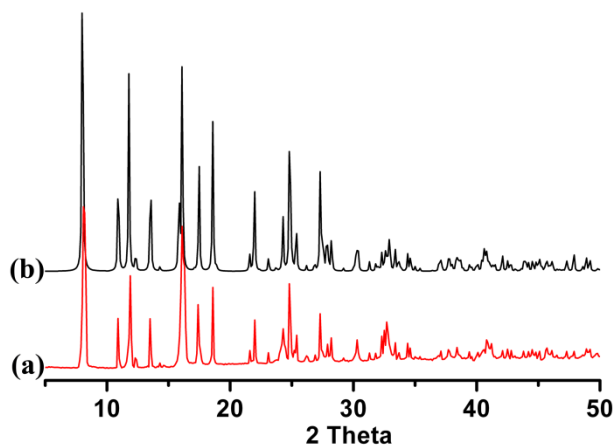

**Fig. S6** The Powder X-ray diffraction (PXRD) patterns for complex **1**: (a) the experimental pattern at room temperature; (b) the simulated pattern from single crystal X-ray data.

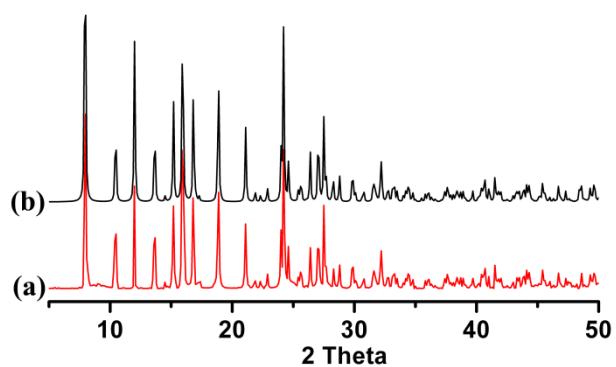

**Fig. S7** The Powder X-ray diffraction (PXRD) patterns for complex **2**: (a) the experimental pattern at room temperature; (b) the simulated pattern from single crystal X-ray data.

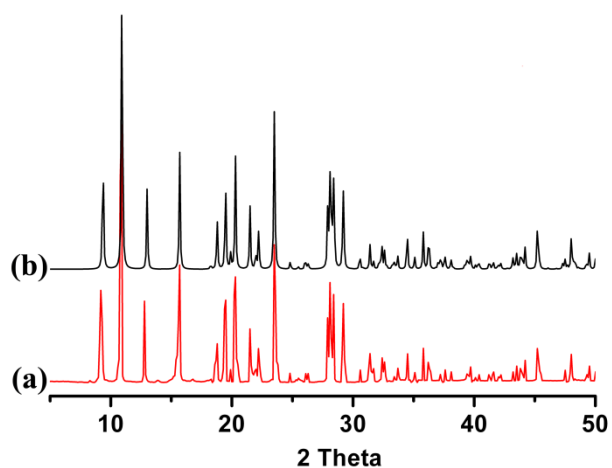

**Fig. S8** The Powder X-ray diffraction (PXRD) patterns for complex **3**: (a) the experimental pattern at room temperature; (b) the simulated pattern from single crystal X-ray data.

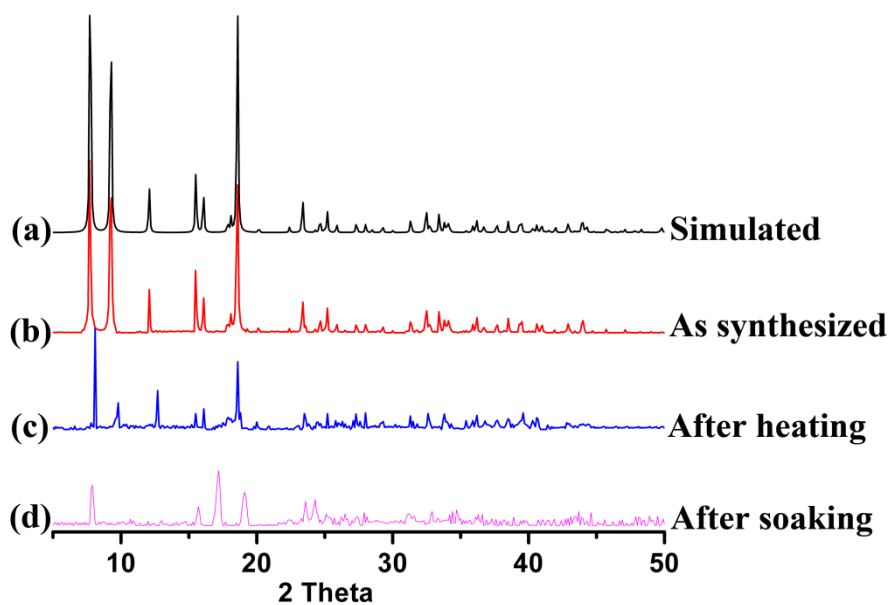

**Fig. S9** The Powder X-ray diffraction (PXRD) patterns for complex **4**: (a) the simulated, (b) the as-synthesized sample, (c) the de-solvated **4a**, and (d) the sample after soaking in water for 4 days.

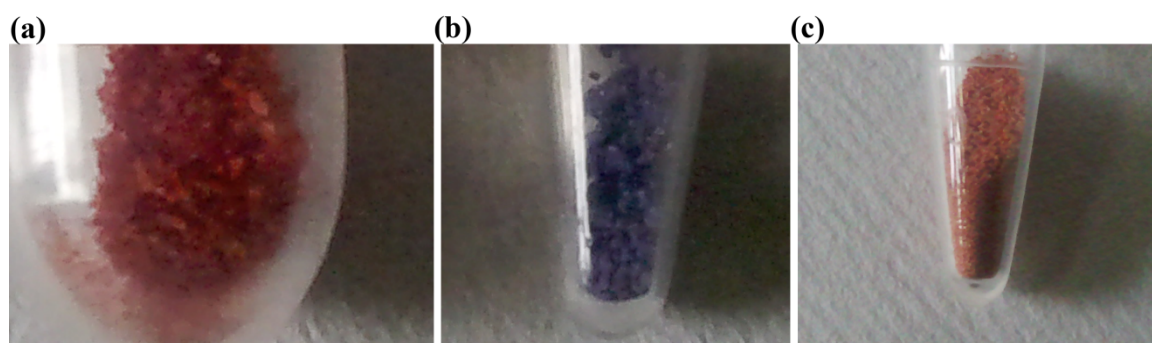

**Fig. S10** The color change: (a) **4**, (b) **4a**, (c) the samples after reabsorption of guest.

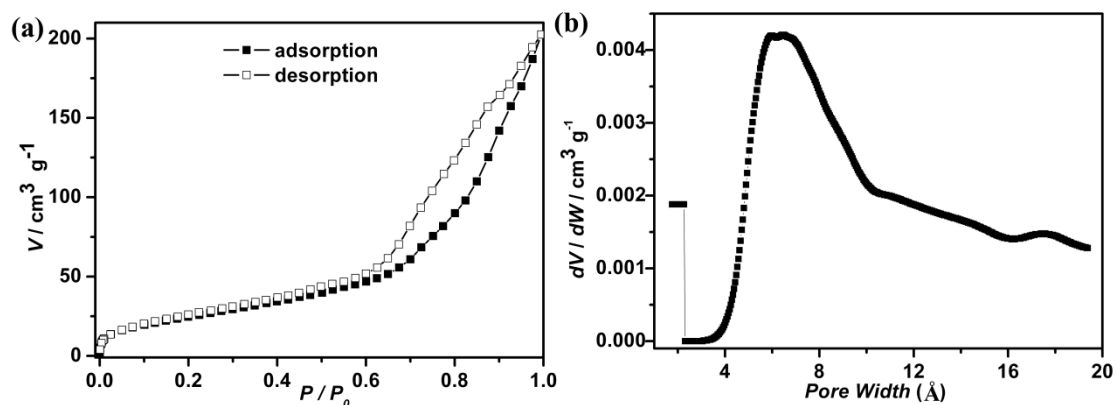

**Fig. S11** (a) The  $N_2$ -adsorption isotherms at 77 K for **4a**. (b) Pore size distribution estimated from SF-plot model.

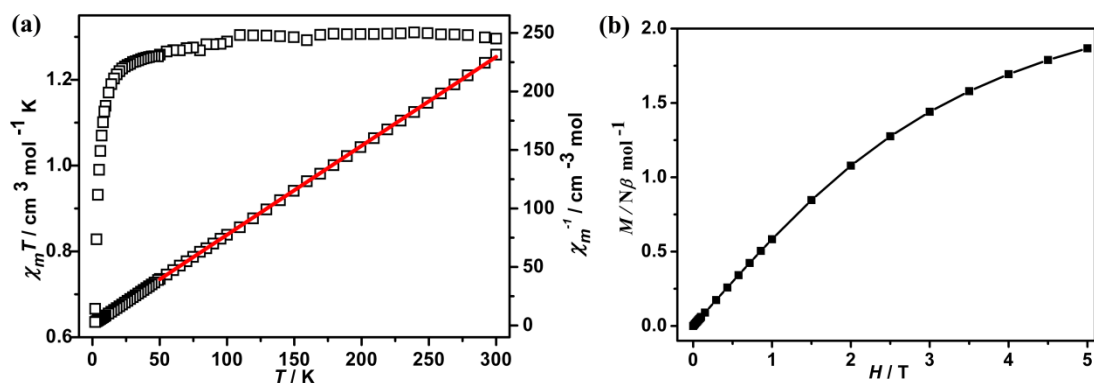

**Fig. S12** The magnetic data for complex 1: (a) plots of  $\chi_m T$  and  $\chi_m^{-1}$  versus  $T$  at 1000 Oe; (b) the Field dependence of magnetization at 2.0 K.

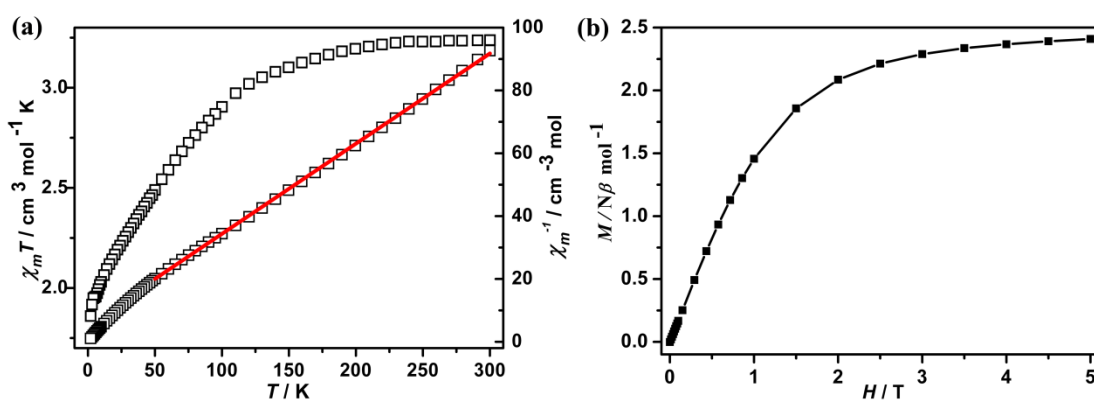

**Fig. S13** The magnetic data for complex 2: (a) plots of  $\chi_m T$  and  $\chi_m^{-1}$  versus  $T$  at 1000 Oe; (b) the Field dependence of magnetization at 2.0 K.

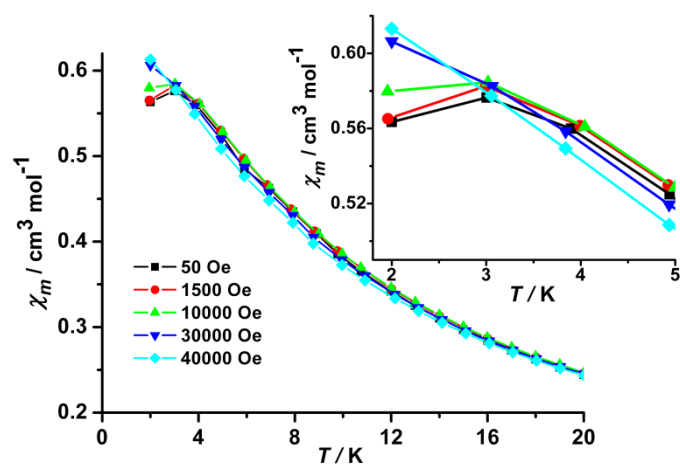

**Fig. S14** The  $\chi_m$  versus  $T$  plot in the temperature range 2-20 K for 4 under different external fields. Inset: enlargement of the signal from 2 to 5 K.

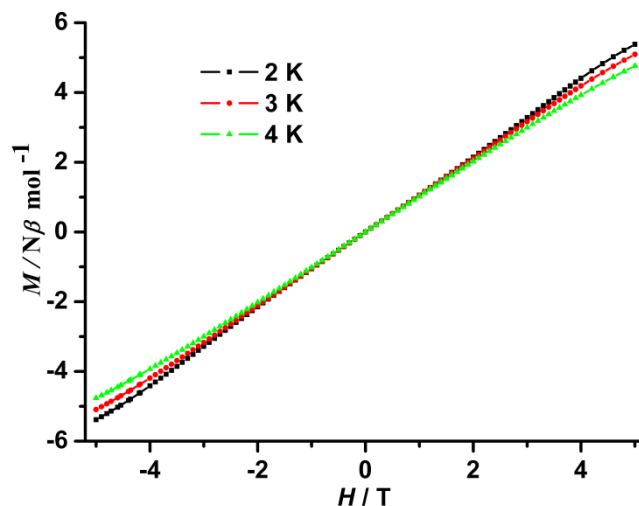

Fig. S15 The displaying no magnetic hysteresis loops at different temperature for 4.

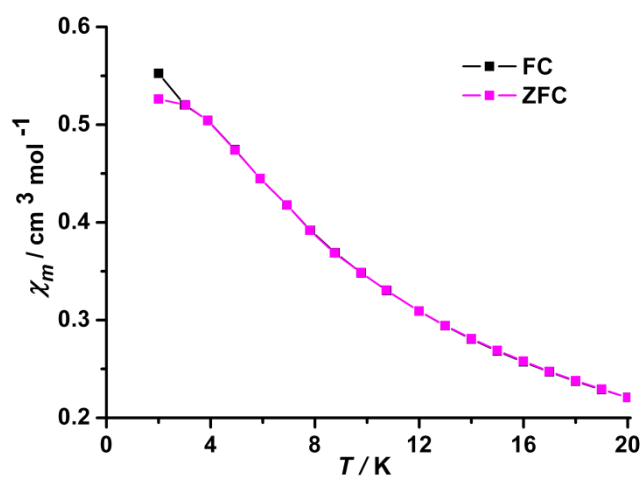

Fig. S16 The FC and ZFC curve for 4 at applied field strength of 10 Oe.

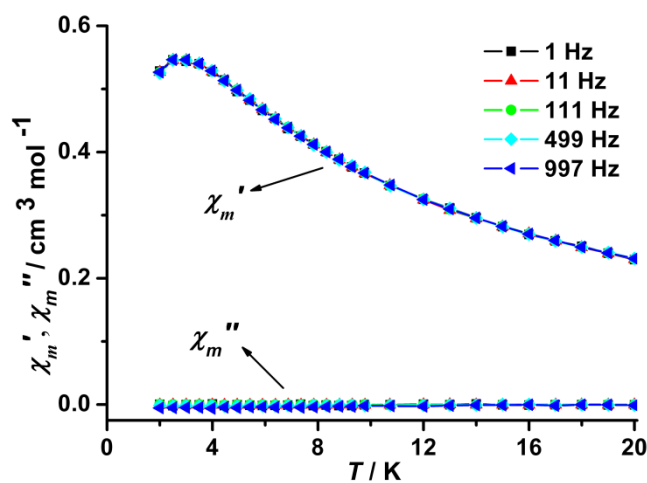

Fig. S17 The Plots of in-phase and out-of-phase magnetic susceptibilities for 4 under  $H_{dc} = 0$  and  $H_{ac} = 3.5$ .

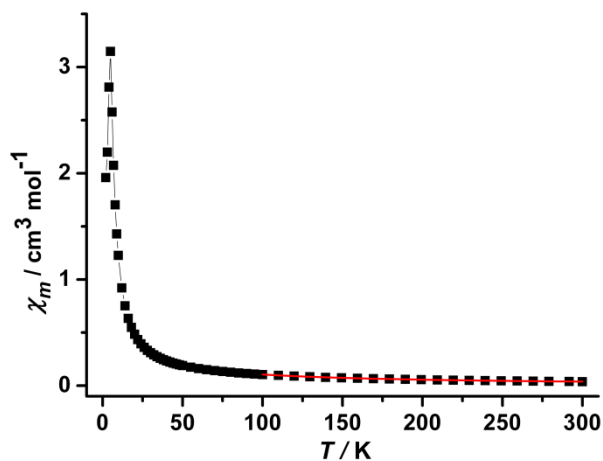

**Fig. S18** The plot of  $\chi_m$  versus  $T$  for **4a**. The red line is the best fitting of Curie-Weiss law.

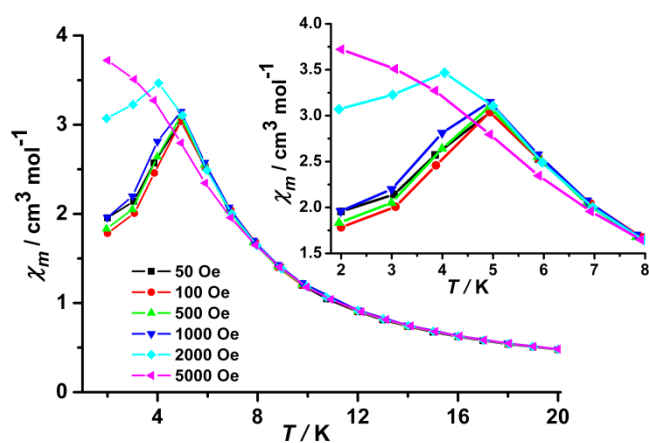

**Fig. S19** The  $\chi_m$  versus  $T$  plot in the temperature range 2-20 K for **4a** under different external fields. Inset: enlargement of the signal from 2 to 8 K.

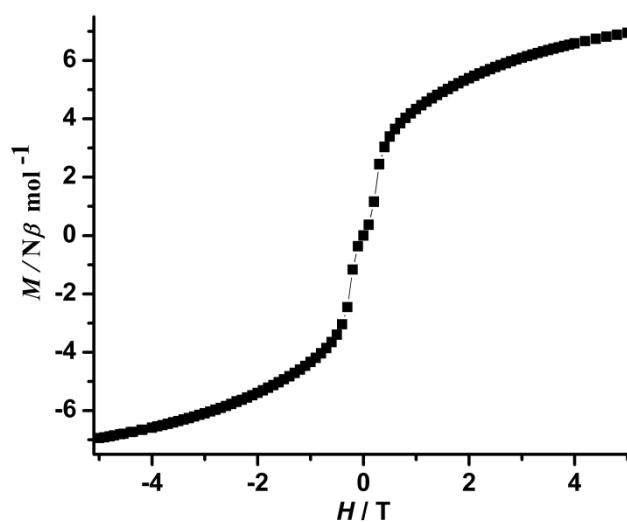

**Fig. S20** The displaying no magnetic hysteresis loop for **4a** at 2 K.



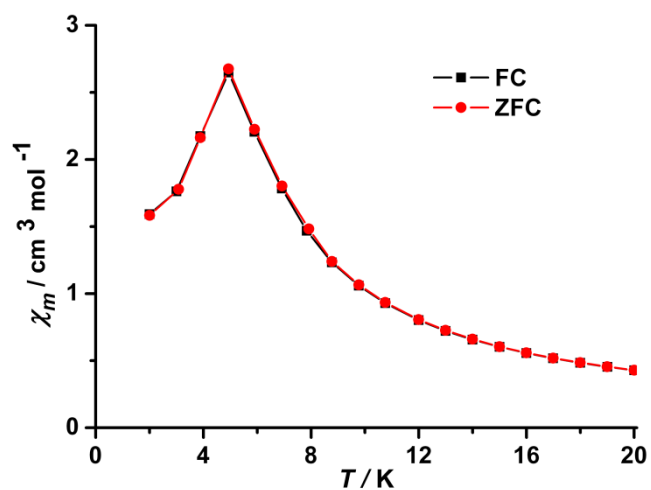

Fig. S21 The FC and ZFC curve for **4a** at applied field strength of 10 Oe.

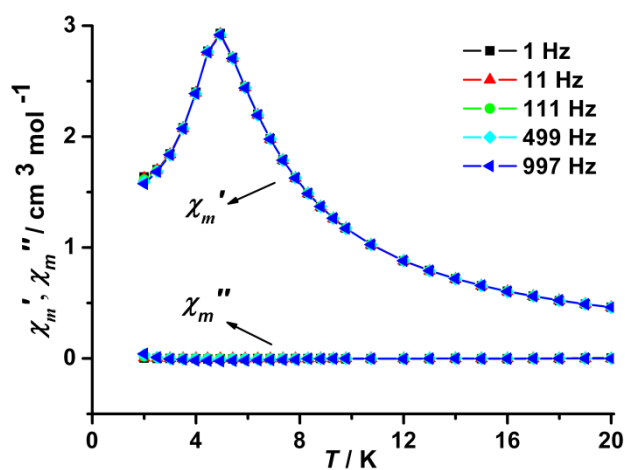

Fig. S22 The Plots of in-phase and out-of-phase magnetic susceptibilities for **4a** under  $H_{dc} = 0$  and  $H_{ac} = 3.5$ .

**Table S1.** The compounds containing H<sub>3</sub>PO<sub>3</sub> and 4, 4'-bpy ligands.

| Formula unit                                                                                                                                                                       | Crystallographic parameters                                                                                                        | Dimension          | Ref.      |
|------------------------------------------------------------------------------------------------------------------------------------------------------------------------------------|------------------------------------------------------------------------------------------------------------------------------------|--------------------|-----------|
| [Ni(HPO <sub>3</sub> )(4,4'-bpy)(H <sub>2</sub> O) <sub>3</sub> ] $\cdot$ 4H <sub>2</sub> O ( <b>1</b> )                                                                           | This work in Table S2                                                                                                              | 1D chain           | this work |
| [Co <sub>2</sub> (HPO <sub>3</sub> ) <sub>2</sub> (4,4'-bpy) <sub>2</sub> (H <sub>2</sub> O) <sub>6</sub> ] $\cdot$ 9H <sub>2</sub> O ( <b>2</b> )                                 | This work in Table S2                                                                                                              | 1D chain           | this work |
| [Zn(HPO <sub>3</sub> )(4,4'-bpy) <sub>0.5</sub> ] $\cdot$ H <sub>2</sub> O ( <b>3</b> )                                                                                            | This work in Table S2                                                                                                              | 2D sheet           | this work |
| [Co <sub>3</sub> (PO <sub>3</sub> ) <sub>2</sub> (4,4'-bpy) <sub>3</sub> (H <sub>2</sub> O) <sub>6</sub> ] $\cdot$ 3H <sub>2</sub> O ( <b>4</b> )                                  | This work in Table S2                                                                                                              | 3D network         | this work |
| Co(HPO <sub>3</sub> )(4,4'-bpy)(H <sub>2</sub> O)                                                                                                                                  | Monoclinic <i>Cc</i><br>a=22.477(7) Å<br>b=5.280(1) Å<br>c=10.404(4) Å<br>β=96.08(3)°<br>V=1227.8(7) Å <sup>3</sup>                | Rectangular grids  | [1]       |
| Zn(HPO <sub>3</sub> )(4,4'-bpy) <sub>0.5</sub> ( <b>5</b> )                                                                                                                        | Monoclinic <i>P21/c</i><br>a=9.758(2) Å<br>b=7.449(3) Å<br>c=10.277(2) Å<br>β=100.02(2)°<br>V=735.6(4) Å <sup>3</sup>              | 3D structure       | [1]       |
| [Co(C <sub>10</sub> H <sub>8</sub> N <sub>2</sub> )(H <sub>2</sub> PO <sub>3</sub> ) <sub>2</sub> ]                                                                                | Monoclinic <i>C2/c</i><br>a= 17.2718(6) Å<br>b= 11.4561(4) Å<br>c= 16.9932(5) Å<br>β= 119.014(10)°<br>V=2940.42(17) Å <sup>3</sup> | 2D layer structure | [2]       |
| [(C <sub>10</sub> H <sub>10</sub> N <sub>2</sub> )] [V <sub>2</sub> <sup>IV</sup> O <sub>2</sub> (HPO <sub>3</sub> ) <sub>2</sub> (H <sub>2</sub> PO <sub>3</sub> ) <sub>2</sub> ] | Monoclinic <i>P21/c</i><br>a= 6.3541(14) Å<br>b= 10.460(2) Å<br>c= 14.769(3) Å<br>β= 90.412(5)°<br>V=981.6(4) Å <sup>3</sup>       | 3D framework       | [3]       |

**Table S2.** Crystallographic data and structure refinement summary for complexes **1-4**.

|                       | <b>1</b>                                                           | <b>2</b>                                                                                      | <b>3</b>                                          | <b>4</b>                                                                                      |
|-----------------------|--------------------------------------------------------------------|-----------------------------------------------------------------------------------------------|---------------------------------------------------|-----------------------------------------------------------------------------------------------|
| <b>formula</b>        | C <sub>10</sub> H <sub>23</sub> N <sub>2</sub> NiO <sub>10</sub> P | C <sub>20</sub> H <sub>48</sub> Co <sub>2</sub> N <sub>4</sub> O <sub>21</sub> P <sub>2</sub> | C <sub>5</sub> H <sub>7</sub> NO <sub>4</sub> PZn | C <sub>30</sub> H <sub>42</sub> Co <sub>3</sub> N <sub>6</sub> O <sub>15</sub> P <sub>2</sub> |
| <b>fw</b>             | 421                                                                | 860.42                                                                                        | 241.48                                            | 965.43                                                                                        |
| <b>space group</b>    | <i>C 2</i>                                                         | <i>C 2</i>                                                                                    | <i>P 21/c</i>                                     | <i>P 6/m c c</i>                                                                              |
| <b>crystal system</b> | Monoclinic                                                         | Monoclinic                                                                                    | Monoclinic                                        | Hexagonal                                                                                     |
| <b>a/Å</b>            | 16.696(86)                                                         | 17.189(5)                                                                                     | 11.4350(7)                                        | 11.0320(5)                                                                                    |
| <b>b/Å</b>            | 14.997(79)                                                         | 14.748(5)                                                                                     | 5.2040(2)                                         | 11.0320(5)                                                                                    |
| <b>c/Å</b>            | 7.400(4)                                                           | 7.469(5)                                                                                      | 16.4787(10)                                       | 22.8380(13)                                                                                   |
| <b>a/°</b>            | 90                                                                 | 90                                                                                            | 90                                                | 90                                                                                            |
| <b>β/°</b>            | 104.42(6)                                                          | 100.047(5)                                                                                    | 124.283(4)                                        | 90                                                                                            |
| <b>γ/°</b>            | 90                                                                 | 90                                                                                            | 90                                                | 120                                                                                           |

|                                |                |                |                |                |
|--------------------------------|----------------|----------------|----------------|----------------|
| $V/\text{\AA}^3$               | 1794.5         | 1864.4(15)     | 1433.33(13)    | 2407.1(2)      |
| $Z$                            | 4              | 2              | 4              | 2              |
| $D_c$ (g.cm <sup>-3</sup> )    | 1.528          | 1.500          | 1.979          | 1.324          |
| $F(000)$                       | 848            | 860            | 484            | 977.9          |
| $\theta$ range (deg)           | 1.85 to 27.82  | 1.83 to 26.02  | 3.61 to 25.00  | 4.10 to 27.08  |
| unique reflns ( $R_{int}$ )    | 4250 (0.0318)  | 3690 (0.0415)  | 1428 (0.0376)  | 922(0.0414)    |
| $RI,^a wR2^b(I > 2\sigma(I))$  | 0.0553, 0.1455 | 0.0541, 0.1285 | 0.0456, 0.1128 | 0.0661, 0.1503 |
| $RI,^a wR2^b(\text{all data})$ | 0.0597, 0.1487 | 0.0598, 0.1321 | 0.0539, 0.1224 | 0.0808, 0.1584 |
| GOF on $F^2$                   | 1.034          | 1.053          | 1.081          | 1.015          |

$$^a R = \frac{\sum \|F_o\| - \|F_c\|}{\sum \|F_c\|}, ^b wR_2 = \left[ \frac{\sum w(|F_o| - |F_c|)^2}{\sum w(F_o^2)} \right]^{1/2}, w = 1/\sigma(F_o)^2.$$

**Table S3.** The pH value comparison.

| Systems  | pH <sup>1</sup> | pH <sup>2</sup> | pH <sup>3</sup> | pH <sup>4</sup> |
|----------|-----------------|-----------------|-----------------|-----------------|
| <b>1</b> | 4.33            | 4.63            | 4.33            | 4.68            |
| <b>2</b> | 4.24            | 4.51            | 4.46            | 4.65            |
| <b>3</b> | 4.01            | 4.44            | 4.11            | 4.39            |

Note: <sup>1</sup> the systems without 4-hydroxypyridine; <sup>2</sup> the systems with 4-hydroxypyridine; <sup>3</sup> the systems with 1, 2, 4-triazole; <sup>4</sup> the systems with imidazole.

**Table S4.** Selected bond lengths (Å) and angles (deg) for **1**.

| Bond lengths [Å]  |           |                   |            |
|-------------------|-----------|-------------------|------------|
| Ni(1)-O(1)        | 2.054(4)  | Ni(1)-O(4W)       | 2.067(4)   |
| Ni(1)-O(5W)       | 2.074(4)  | P(1)-O(1)         | 1.511(4)   |
| Ni(1)-N(2)        | 2.089(4)  | P(1)-O(2)         | 1.512(5)   |
| Ni(1)-O(6W)       | 2.092(4)  | P(1)-O(3)         | 1.510(5)   |
| Ni(1)-N(1)        | 2.084(4)  |                   |            |
| Angles [deg]      |           |                   |            |
| O(1)-Ni(1)-O(4W)  | 88.42(16) | O(1)-Ni(1)-O(5W)  | 178.01(18) |
| O(4W)-Ni(1)-O(5W) | 89.68(17) | O(1)-Ni(1)-N(1)   | 91.27(18)  |
| O(4W)-Ni(1)-N(1)  | 87.98(18) | O(5W)-Ni(1)-N(1)  | 89.28(18)  |
| O(1)-Ni(1)-N(2)   | 90.64(17) | O(4W)-Ni(1)-N(2)  | 91.02(18)  |
| O(5W)-Ni(1)-N(2)  | 88.78(18) | N(1)-Ni(1)-N(2)   | 177.8(2)   |
| O(1)-Ni(1)-O(6W)  | 90.47(17) | O(4W)-Ni(1)-O(6W) | 174.73(18) |
| O(5W)-Ni(1)-O(6W) | 91.47(18) | N(1)-Ni(1)-O(6W)  | 86.89(18)  |
| N(2)-Ni(1)-O(6W)  | 94.14(19) |                   |            |

**Table S5.** Selected bond lengths (Å) and angles (deg) for **2**.

| Bond lengths [Å] |          |            |          |
|------------------|----------|------------|----------|
| Co(1)-O(1)       | 2.101(4) | Co(1)-O(4) | 2.147(4) |
| Co(1)-N(1)       | 2.122(4) | P(1)-O(1)  | 1.514(4) |
| Co(1)-O(6)       | 2.134(4) | P(1)-O(2)  | 1.531(4) |

|                 |            |                 |            |
|-----------------|------------|-----------------|------------|
| Co(1)-N(2)      | 2.130(4)   | P(1)-O(3)       | 1.523(4)   |
| Co(1)-O(5)      | 2.111(4)   |                 |            |
| Angles [deg]    |            |                 |            |
| O(1)-Co(1)-O(5) | 87.54(15)  | O(1)-Co(1)-N(1) | 92.45(16)  |
| O(5)-Co(1)-N(1) | 87.79(17)  | O(1)-Co(1)-N(2) | 91.00(16)  |
| O(5)-Co(1)-N(2) | 91.62(16)  | N(1)-Co(1)-N(2) | 176.47(18) |
| O(1)-Co(1)-O(6) | 177.25(15) | O(5)-Co(1)-O(6) | 91.34(16)  |
| N(1)-Co(1)-O(6) | 90.02(16)  | N(2)-Co(1)-O(6) | 86.51(16)  |
| O(1)-Co(1)-O(4) | 88.81(15)  | O(5)-Co(1)-O(4) | 172.38(16) |
| N(1)-Co(1)-O(4) | 85.69(17)  | N(2)-Co(1)-O(4) | 95.13(17)  |
| O(6)-Co(1)-O(4) | 92.59(16)  |                 |            |

**Table S6.** Selected bond lengths (Å) and angles (deg) for **3**.

|                   |            |                     |            |
|-------------------|------------|---------------------|------------|
| Bond lengths [Å]  |            |                     |            |
| Zn(1)-O(3)#1      | 1.909(3)   | P(1)-O(1)           | 1.500(4)   |
| Zn(1)-O(1)        | 1.925(4)   | P(1)-O(2)           | 1.518(3)   |
| Zn(1)-O(2)#2      | 1.927(3)   | P(1)-O(3)           | 1.497(4)   |
| Zn(1)-N(1)        | 2.047(4)   |                     |            |
| Angles [deg]      |            |                     |            |
| O(3)#1-Zn(1)-O(1) | 113.90(19) | O(3)#1-Zn(1)-O(2)#2 | 110.26(16) |
| O(1)-Zn(1)-O(2)#2 | 115.51(15) | O(3)#1-Zn(1)-N(1)   | 108.19(14) |
| O(1)-Zn(1)-N(1)   | 101.36(16) | O(2)#2-Zn(1)-N(1)   | 106.74(15) |

Symmetry transformations used to generate equivalent atoms: #1 -x+1, -y+1, -z+2; #2 -x+1, -y, -z+2.

**Table S7.** Selected bond lengths (Å) and angles (deg) for **4**.

|                   |          |                   |           |
|-------------------|----------|-------------------|-----------|
| Bond lengths [Å]  |          |                   |           |
| Co(1)-O(1)        | 2.027(5) | Co(1)-N(1)        | 2.166(6)  |
| Co(1)-O(2)        | 2.154(5) | P(1)-O(1)         | 1.541(5)  |
| Angles [deg]      |          |                   |           |
| O(1)#1-Co(1)-O(2) | 87.6(2)  | O(1)-Co(1)-O(2)   | 92.41(19) |
| O(1)#1-Co(1)-O(1) | 180.0    | O(2)-Co(1)-O(2)#1 | 180.0     |
| O(1)-Co(1)-N(1)   | 90.0     | N(1)#1-Co(1)-N(1) | 180.0     |

Symmetry transformations used to generate equivalent atoms: #1 -x+1, -y+1, -z+1.

CCDC 940447 (**1**), 940448 (**2**), 940446 (**3**), and 940449 (**4**) contain the supplementary crystallographic data for this paper. These data can be obtained free of charge via [www.ccdc.cam.ac.uk/conts/retrieving.html](http://www.ccdc.cam.ac.uk/conts/retrieving.html).

## References

- [1] J.-H. Liao, P.-L. Chen, C.-C. Hsu, *J. Phys. Chem. Solids*, **2001**, *62*, 1629.
- [2] a) P. Ramaswamy, S. Mandal, N. N. Hegde, R. Prabhu, D. Banerjee, S. V. Bhat, S. Natarajan, *Eur. J. Inorg. Chem.*, **2010**, *2010*, 1829; b) S. Natarajan, S. Mandal, P. Mahata, V. K. Rao, P. Ramaswamy, A. Banerjee, A. K. Paul, K. V. Ramya, *F. R. Orgmet. Chem. Pr. Tri. Sem.*, **2006**, *118*, 525.
- [3] X. Jing, L. Zhang, S. Gong, G. Li, M. Bi, Q. Huo, Y. Liu, *Microporous and Mesoporous Materials*, **2008**, *116*, 101.
